# Supplementary material
Source: publisher site journal article supplement (https://www.dovepress.com/get_supplementary_file.php?f=265690.docx)
Supplement: Supplementary file 1 [file get_supplementary_file.php]

# Supplemental Material

Supplemental Table 1. All-cause costs among pediatric patients diagnosed with NF1 and PN during the follow-up period

|  | Mean (SD) costs, PPPY | Median (Q1, Q3) costs, PPPY |
| --- | --- | --- |
| Overall costs (Medical + Pharmacy) | $38,292.34 (80,556.01) | $16,036.71 (6,933.49, 40,137.84) |
| Total medical costs | $33,049.28 (75,908.36) | $14,827.64 (5,764.99, 35,805.89) |
| Inpatient costs | $9,323.42 (54,907.72) | $0.00 (-) |
| ER costs | $560.55 (2,059.20) | $0.00 (0.00, 383.37) |
| Outpatient costs | $22,297.38 (34,199.45) | $13,650.30 (5,164.36, 25,989.13) |
| Other costs | $867.93 (3,016.27) | $12.30 (0.00, 415.06) |
| Pharmacy costs | $5,243.06 (23,319.18) | $321.21 (28.87, 1,607.06) |

ER, emergency room; PPPY, per patient per year; SD, standard deviation

Costs adjusted to 2018 USD.

Supplemental Figure 1. Study diagram





NF1, neurofibromatosis type 1; PN, plexiform neurofibroma
